# Supplementary material for: T-cell engager bispecific antibodies enable T cells to eliminate Multiple Myeloma by targeting tumor CD38 in combination with PD-L1
Source: Research Square preprint supplement (doi:10.21203/rs.3.rs-8174877/v1), 2025-12-08
Supplement: Supplementary file 1 [file 246b30c7f1f6cdba9a3b1b24.xlsx]

## Sheet: 数据处理
	GENE			Average value			△CT=CT目的基因-Ct内参基因		△△CT=△CT实验-△CT对照		扩增倍数=2-△△CT
标本编号	GAPDH	TNFα		GAPDH	TNFα		TNFα		TNFα		TNFα		标本编号	TNFα
vehicle1	17.404	26.058											vehicle1	1
	17.53	25.934		17.4523	26.046		8.59367		0		1		vehicle2	1.10012
	17.423	26.146											PD-L1 1	2.37402
vehicle2	16.125	24.562											PD-L1 2	2.51403
	15.996	24.63		16.1137	24.5697		8.456		-0.137667		1.10012
	16.22	24.517											28-1	1.14024
PD-L1 1	16.07	23.375											28-2	1.41814
	16.086	23.392		16.0577	23.404		7.34633		-1.24733		2.37402
	16.017	23.445
PD-L1 2	16.184	23.383
	16.01	23.347		16.098	23.3617		7.26367		-1.33		2.51403
	16.1	23.355
28-1	16.569	24.987
	16.646	24.894		16.578	24.9823		8.40433		-0.189333		1.14024
	16.519	25.066
28-2	17.107	25.236
	17.21	25.299		17.1863	25.276		8.08967		-0.504		1.41814
	17.242	25.293

## Sheet: 引物序列
					Primer名称	序列(5'to3')	product length
				NM_001357943.2	H-GAPDH-S	GGAAGCTTGTCATCAATGGAAATC	168
					H-GAPDH-A	TGATGACCCTTTTGGCTCCC
				NM_000594.4	H-TNFα-F	GAGGCCAAGCCCTGGTATG	91
					H-TNFα-R	CGGGCCGATTGATCTCAGC
