# Supplementary material for: T-cell engager bispecific antibodies enable T cells to eliminate Multiple Myeloma by targeting tumor CD38 in combination with PD-L1
Source: Research Square preprint supplement (doi:10.21203/rs.3.rs-8174877/v1), 2025-12-08
Supplement: Supplementary file 2 [file 8219157c3af8369f3df9b2ad.xlsx]

## Sheet: Sheet1
	gene			average value			△CT=CTtarget gene-CTreference genes		△△CT=△CTexperiment-△CTcontrast		Multiplication factor=2-△△CT
Specimen number	GAPDH	CD8		GAPDH	CD8		CD8		CD8		CD8		标本编号	CD8
vehicle1	16.328	30.615											vehicle1	0.987145
	16.375	30.385		16.3757	30.5177		14.142		0.0186667		0.987145		vehicle2	4.87581e-05
	16.424	30.553											PD-L1 1	1.01139
vehicle2	17.136	31.395
	17.139	31.384		17.1547	31.4787		14.324		14.324		4.87581e-05		PD-L1 2	1.10343
	17.189	31.657											28-1	1.22688
PD-L1 1	15.971	29.896											28-2	1.57607
	16.023	30.07		15.9973	30.1043		14.107		-0.0163333		1.01139
	15.998	30.347
PD-L1 2	15.945	30.007
	15.979	29.928		15.9807	29.962		13.9813		-0.142		1.10343
	16.018	29.951
28-1	16.097	29.972
	16.12	30.08		16.1257	29.954		13.8283		-0.295		1.22688
	16.16	29.81
28-2	16.268	29.641
	16.178	29.593		16.2143	29.6813		13.467		-0.656333		1.57607
	16.197	29.81
