# Supplementary material for: T-cell engager bispecific antibodies enable T cells to eliminate Multiple Myeloma by targeting tumor CD38 in combination with PD-L1
Source: Research Square preprint supplement (doi:10.21203/rs.3.rs-8174877/v1), 2025-12-08
Supplement: Supplementary file 3 [file dc653e3b2d40ddff87de83c3.xlsx]

## Sheet: Sheet1
	gene			average value			△CT=CTtarget gene-CTreference genes		△△CT=△CTexperiment-△CTcontrast		Multiplication factor=2-△△CT
Specimen number	GAPDH	CD4		GAPDH	CD4		CD4		CD4		CD4		Specimen number	CD4
vehicle1	16.328	25.771											vehicle1	0.916157
	16.375	26.157		16.3757	26.04		9.66433		0.126333		0.916157		vehicle2	0.936272
	16.424	26.192											PD-L1 1	1.07153
vehicle2	16.097	25.664											PD-L1 2	1.10983
	16.12	25.809		16.1257	25.7587		9.633		0.095		0.936272
	16.16	25.803											28-1	1.51537
PD-L1 1	17.136	26.637											28-2	1.36998
	17.139	26.499		17.1547	26.593		9.43833		-0.0996667		1.07153
	17.189	26.643
PD-L1 2	15.945	25.282
	15.979	25.343		15.9807	25.3683		9.38767		-0.150333		1.10983
	16.018	25.48
28-1	15.971	24.937
	16.023	24.921		15.9973	24.9357		8.93833		-0.599667		1.51537
	15.998	24.949
28-2	16.268	24.421
	16.178	24.507		16.2143	24.5083		8.294		-0.454		1.36998
	16.197	24.597
